# Supplementary material for: Microsatellite-Based Genetic Structure and Hybrid Detection in Alpacas Bred in Poland
Source: MDPI journal article supplement (doi:10.3390/ani11082193), 2021-07-23
Supplement: s1 [file s1]

Table S1. List of tested animals with estimated membership coefficient value ( $q$ ).

| Sample | Takson               | Origin of the sample | Estimated membership coefficient value ( $q$ ) |       |
|--------|----------------------|----------------------|------------------------------------------------|-------|
|        |                      |                      | Alpaca                                         | Llama |
| 1      | <i>Vicugna pacos</i> | England              | 0.996                                          | 0.004 |
| 2      | <i>Vicugna pacos</i> | England              | 0.997                                          | 0.003 |
| 3      | <i>Vicugna pacos</i> | England              | 0.983                                          | 0.017 |
| 4      | <i>Vicugna pacos</i> | Poland               | 0.996                                          | 0.004 |
| 5      | <i>Vicugna pacos</i> | Poland               | 0.997                                          | 0.003 |
| 6      | <i>Vicugna pacos</i> | Poland               | 0.996                                          | 0.004 |
| 7      | <i>Vicugna pacos</i> | England              | 0.996                                          | 0.004 |
| 8      | <i>Vicugna pacos</i> | England              | 0.994                                          | 0.006 |
| 9      | <i>Vicugna pacos</i> | The Netherlands      | 0.997                                          | 0.003 |
| 10     | <i>Vicugna pacos</i> | Poland               | 0.997                                          | 0.003 |
| 11     | <i>Vicugna pacos</i> | Poland               | 0.995                                          | 0.005 |
| 12     | <i>Vicugna pacos</i> | Chile                | 0.996                                          | 0.004 |
| 13     | <i>Vicugna pacos</i> | Poland               | 0.996                                          | 0.004 |
| 14     | <i>Vicugna pacos</i> | Poland               | 0.994                                          | 0.006 |
| 15     | <i>Vicugna pacos</i> | Chile                | 0.801                                          | 0.199 |
| 16     | <i>Vicugna pacos</i> | Poland               | 0.989                                          | 0.011 |
| 17     | <i>Vicugna pacos</i> | Unknown*             | 0.996                                          | 0.004 |
| 18     | <i>Vicugna pacos</i> | Chile                | 0.996                                          | 0.004 |
| 19     | <i>Vicugna pacos</i> | Chile                | 0.984                                          | 0.016 |
| 20     | <i>Vicugna pacos</i> | Poland               | 0.998                                          | 0.002 |
| 21     | <i>Vicugna pacos</i> | Poland               | 0.994                                          | 0.006 |
| 22     | <i>Vicugna pacos</i> | England              | 0.996                                          | 0.004 |
| 23     | <i>Vicugna pacos</i> | England              | 0.995                                          | 0.005 |
| 24     | <i>Vicugna pacos</i> | England              | 0.910                                          | 0.090 |
| 25     | <i>Vicugna pacos</i> | Poland               | 0.996                                          | 0.004 |
| 26     | <i>Vicugna pacos</i> | Belgium              | 0.994                                          | 0.006 |
| 27     | <i>Vicugna pacos</i> | Belgium              | 0.988                                          | 0.012 |
| 28     | <i>Vicugna pacos</i> | Belgium              | 0.989                                          | 0.012 |
| 29     | <i>Vicugna pacos</i> | England              | 0.988                                          | 0.012 |
| 30     | <i>Vicugna pacos</i> | Poland               | 0.994                                          | 0.006 |
| 31     | <i>Vicugna pacos</i> | England              | 0.990                                          | 0.010 |
| 32     | <i>Vicugna pacos</i> | Poland               | 0.998                                          | 0.002 |
| 33     | <i>Vicugna pacos</i> | England              | 0.996                                          | 0.004 |
| 34     | <i>Vicugna pacos</i> | Poland               | 0.986                                          | 0.014 |
| 35     | <i>Vicugna pacos</i> | Poland               | 0.997                                          | 0.003 |
| 36     | <i>Vicugna pacos</i> | Australia            | 0.998                                          | 0.002 |
| 37     | <i>Vicugna pacos</i> | Belgium              | 0.995                                          | 0.006 |
| 38     | <i>Vicugna pacos</i> | Belgium              | 0.991                                          | 0.009 |
| 39     | <i>Vicugna pacos</i> | Unknown*             | 0.997                                          | 0.003 |
| 40     | <i>Vicugna pacos</i> | Australia            | 0.992                                          | 0.008 |
| 41     | <i>Vicugna pacos</i> | Poland               | 0.946                                          | 0.054 |

|    |                      |                 |       |       |
|----|----------------------|-----------------|-------|-------|
| 42 | <i>Vicugna pacos</i> | England         | 0.995 | 0.005 |
| 43 | <i>Vicugna pacos</i> | Poland          | 0.998 | 0.002 |
| 44 | <i>Vicugna pacos</i> | Belgium         | 0.990 | 0.010 |
| 45 | <i>Vicugna pacos</i> | Belgium         | 0.995 | 0.005 |
| 46 | <i>Vicugna pacos</i> | England         | 0.997 | 0.003 |
| 47 | <i>Vicugna pacos</i> | England         | 0.987 | 0.013 |
| 48 | <i>Vicugna pacos</i> | Czech Republic  | 0.995 | 0.005 |
| 49 | <i>Vicugna pacos</i> | Unknown*        | 0.986 | 0.014 |
| 50 | <i>Vicugna pacos</i> | Unknown*        | 0.996 | 0.004 |
| 51 | <i>Vicugna pacos</i> | Poland          | 0.993 | 0.007 |
| 52 | <i>Vicugna pacos</i> | Unknown*        | 0.995 | 0.005 |
| 53 | <i>Vicugna pacos</i> | Unknown*        | 0.990 | 0.010 |
| 54 | <i>Vicugna pacos</i> | Unknown*        | 0.985 | 0.015 |
| 55 | <i>Vicugna pacos</i> | Unknown*        | 0.995 | 0.005 |
| 56 | <i>Vicugna pacos</i> | Unknown*        | 0.995 | 0.005 |
| 57 | <i>Vicugna pacos</i> | Unknown*        | 0.994 | 0.006 |
| 58 | <i>Vicugna pacos</i> | Unknown*        | 0.993 | 0.008 |
| 59 | <i>Vicugna pacos</i> | Unknown*        | 0.993 | 0.007 |
| 60 | <i>Vicugna pacos</i> | Unknown*        | 0.994 | 0.006 |
| 61 | <i>Vicugna pacos</i> | Unknown*        | 0.988 | 0.012 |
| 62 | <i>Vicugna pacos</i> | Unknown*        | 0.995 | 0.005 |
| 63 | <i>Vicugna pacos</i> | Unknown*        | 0.993 | 0.007 |
| 64 | <i>Vicugna pacos</i> | Unknown*        | 0.981 | 0.019 |
| 65 | <i>Vicugna pacos</i> | Unknown*        | 0.995 | 0.006 |
| 66 | <i>Vicugna pacos</i> | Unknown*        | 0.991 | 0.009 |
| 67 | <i>Vicugna pacos</i> | Unknown*        | 0.894 | 0.106 |
| 68 | <i>Vicugna pacos</i> | Unknown*        | 0.995 | 0.005 |
| 69 | <i>Vicugna pacos</i> | Poland          | 0.976 | 0.024 |
| 70 | <i>Vicugna pacos</i> | Poland          | 0.998 | 0.002 |
| 71 | <i>Vicugna pacos</i> | Poland          | 0.997 | 0.003 |
| 72 | <i>Vicugna pacos</i> | Poland          | 0.997 | 0.003 |
| 73 | <i>Vicugna pacos</i> | Poland          | 0.995 | 0.005 |
| 74 | <i>Vicugna pacos</i> | Poland          | 0.998 | 0.002 |
| 75 | <i>Vicugna pacos</i> | Poland          | 0.996 | 0.004 |
| 76 | <i>Vicugna pacos</i> | Poland          | 0.995 | 0.005 |
| 77 | <i>Vicugna pacos</i> | Switzerland     | 0.996 | 0.004 |
| 78 | <i>Vicugna pacos</i> | Poland          | 0.997 | 0.003 |
| 79 | <i>Vicugna pacos</i> | Poland          | 0.995 | 0.005 |
| 80 | <i>Vicugna pacos</i> | Poland          | 0.994 | 0.007 |
| 81 | <i>Vicugna pacos</i> | Poland          | 0.989 | 0.011 |
| 82 | <i>Vicugna pacos</i> | The Netherlands | 0.984 | 0.016 |
| 83 | <i>Vicugna pacos</i> | Chile           | 0.997 | 0.004 |
| 84 | <i>Vicugna pacos</i> | USA             | 0.996 | 0.004 |
| 85 | <i>Vicugna pacos</i> | Poland          | 0.998 | 0.002 |
| 86 | <i>Vicugna pacos</i> | Poland          | 0.986 | 0.014 |
| 87 | <i>Vicugna pacos</i> | Germany         | 0.984 | 0.017 |

|     |                      |          |       |       |
|-----|----------------------|----------|-------|-------|
| 88  | <i>Vicugna pacos</i> | Poland   | 0.997 | 0.003 |
| 89  | <i>Vicugna pacos</i> | Poland   | 0.995 | 0.005 |
| 90  | <i>Vicugna pacos</i> | Poland   | 0.994 | 0.006 |
| 91  | <i>Vicugna pacos</i> | Germany  | 0.997 | 0.003 |
| 92  | <i>Vicugna pacos</i> | Poland   | 0.982 | 0.018 |
| 93  | <i>Vicugna pacos</i> | Poland   | 0.998 | 0.002 |
| 94  | <i>Vicugna pacos</i> | Poland   | 0.990 | 0.010 |
| 95  | <i>Vicugna pacos</i> | Poland   | 0.988 | 0.012 |
| 96  | <i>Vicugna pacos</i> | Poland   | 0.994 | 0.006 |
| 97  | <i>Vicugna pacos</i> | Poland   | 0.996 | 0.004 |
| 98  | <i>Vicugna pacos</i> | Poland   | 0.996 | 0.004 |
| 99  | <i>Vicugna pacos</i> | England  | 0.995 | 0.005 |
| 100 | <i>Vicugna pacos</i> | Poland   | 0.996 | 0.004 |
| 101 | <i>Vicugna pacos</i> | Poland   | 0.992 | 0.008 |
| 102 | <i>Vicugna pacos</i> | England  | 0.997 | 0.003 |
| 103 | <i>Vicugna pacos</i> | Poland   | 0.998 | 0.002 |
| 104 | <i>Vicugna pacos</i> | Unknown* | 0.996 | 0.004 |
| 105 | <i>Vicugna pacos</i> | Poland   | 0.996 | 0.004 |
| 106 | <i>Vicugna pacos</i> | Unknown* | 0.997 | 0.003 |
| 107 | <i>Vicugna pacos</i> | Poland   | 0.997 | 0.003 |
| 108 | <i>Vicugna pacos</i> | Unknown* | 0.994 | 0.006 |
| 109 | <i>Vicugna pacos</i> | Poland   | 0.989 | 0.011 |
| 110 | <i>Vicugna pacos</i> | Unknown* | 0.997 | 0.003 |
| 111 | <i>Vicugna pacos</i> | Poland   | 0.998 | 0.002 |
| 112 | <i>Vicugna pacos</i> | Unknown* | 0.996 | 0.004 |
| 113 | <i>Vicugna pacos</i> | Poland   | 0.992 | 0.008 |
| 114 | <i>Vicugna pacos</i> | Unknown* | 0.988 | 0.012 |
| 115 | <i>Vicugna pacos</i> | Poland   | 0.922 | 0.078 |
| 116 | <i>Vicugna pacos</i> | Unknown* | 0.993 | 0.007 |
| 117 | <i>Vicugna pacos</i> | Poland   | 0.997 | 0.003 |
| 118 | <i>Vicugna pacos</i> | Unknown* | 0.997 | 0.003 |
| 119 | <i>Vicugna pacos</i> | Poland   | 0.996 | 0.004 |
| 120 | <i>Vicugna pacos</i> | Unknown* | 0.996 | 0.004 |
| 121 | <i>Vicugna pacos</i> | Poland   | 0.994 | 0.006 |
| 122 | <i>Vicugna pacos</i> | Unknown* | 0.998 | 0.002 |
| 123 | <i>Vicugna pacos</i> | Poland   | 0.997 | 0.003 |
| 124 | <i>Vicugna pacos</i> | Unknown* | 0.996 | 0.004 |
| 125 | <i>Vicugna pacos</i> | Poland   | 0.996 | 0.004 |
| 126 | <i>Vicugna pacos</i> | Unknown* | 0.994 | 0.006 |
| 127 | <i>Vicugna pacos</i> | Poland   | 0.992 | 0.008 |
| 128 | <i>Vicugna pacos</i> | Unknown* | 0.997 | 0.003 |
| 129 | <i>Vicugna pacos</i> | Poland   | 0.996 | 0.004 |
| 130 | <i>Vicugna pacos</i> | Unknown* | 0.980 | 0.020 |
| 131 | <i>Vicugna pacos</i> | Poland   | 0.995 | 0.005 |
| 132 | <i>Vicugna pacos</i> | Unknown* | 0.994 | 0.006 |
| 133 | <i>Vicugna pacos</i> | Poland   | 0.949 | 0.051 |

|     |                      |          |       |       |
|-----|----------------------|----------|-------|-------|
| 134 | <i>Vicugna pacos</i> | Unknown* | 0.996 | 0.004 |
| 135 | <i>Vicugna pacos</i> | Poland   | 0.995 | 0.005 |
| 136 | <i>Vicugna pacos</i> | Unknown* | 0.953 | 0.047 |
| 137 | <i>Vicugna pacos</i> | Poland   | 0.974 | 0.026 |
| 138 | <i>Vicugna pacos</i> | Unknown* | 0.995 | 0.005 |
| 139 | <i>Vicugna pacos</i> | Poland   | 0.996 | 0.004 |
| 140 | <i>Vicugna pacos</i> | Unknown* | 0.995 | 0.005 |
| 141 | <i>Vicugna pacos</i> | Poland   | 0.988 | 0.012 |
| 142 | <i>Vicugna pacos</i> | Unknown* | 0.991 | 0.009 |
| 143 | <i>Vicugna pacos</i> | Poland   | 0.974 | 0.026 |
| 144 | <i>Vicugna pacos</i> | Unknown* | 0.994 | 0.006 |
| 145 | <i>Vicugna pacos</i> | Poland   | 0.996 | 0.004 |
| 146 | <i>Vicugna pacos</i> | Unknown* | 0.997 | 0.003 |
| 147 | <i>Vicugna pacos</i> | Poland   | 0.997 | 0.003 |
| 148 | <i>Vicugna pacos</i> | Unknown* | 0.997 | 0.003 |
| 149 | <i>Vicugna pacos</i> | Poland   | 0.992 | 0.008 |
| 150 | <i>Vicugna pacos</i> | Unknown* | 0.997 | 0.003 |
| 151 | <i>Vicugna pacos</i> | Poland   | 0.997 | 0.003 |
| 152 | <i>Vicugna pacos</i> | Unknown* | 0.998 | 0.002 |
| 153 | <i>Vicugna pacos</i> | Poland   | 0.998 | 0.002 |
| 154 | <i>Vicugna pacos</i> | Unknown* | 0.992 | 0.008 |
| 155 | <i>Vicugna pacos</i> | Poland   | 0.910 | 0.090 |
| 156 | <i>Vicugna pacos</i> | Unknown* | 0.867 | 0.133 |
| 157 | <i>Vicugna pacos</i> | Poland   | 0.995 | 0.005 |
| 158 | <i>Vicugna pacos</i> | Unknown* | 0.993 | 0.007 |
| 159 | <i>Vicugna pacos</i> | Unknown* | 0.992 | 0.008 |
| 160 | <i>Vicugna pacos</i> | Unknown* | 0.995 | 0.005 |
| 161 | <i>Vicugna pacos</i> | Unknown* | 0.987 | 0.013 |
| 162 | <i>Vicugna pacos</i> | Unknown* | 0.997 | 0.003 |
| 163 | <i>Vicugna pacos</i> | Chile    | 0.938 | 0.063 |
| 164 | <i>Vicugna pacos</i> | Unknown* | 0.996 | 0.004 |
| 165 | <i>Vicugna pacos</i> | Unknown* | 0.993 | 0.007 |
| 166 | <i>Vicugna pacos</i> | Unknown* | 0.997 | 0.003 |
| 167 | <i>Vicugna pacos</i> | Unknown* | 0.995 | 0.005 |
| 168 | <i>Vicugna pacos</i> | Unknown* | 0.948 | 0.052 |
| 169 | <i>Vicugna pacos</i> | Unknown* | 0.998 | 0.002 |
| 170 | <i>Vicugna pacos</i> | Unknown* | 0.987 | 0.013 |
| 171 | <i>Vicugna pacos</i> | Unknown* | 0.996 | 0.004 |
| 172 | <i>Vicugna pacos</i> | Unknown* | 0.994 | 0.006 |
| 173 | <i>Vicugna pacos</i> | Unknown* | 0.996 | 0.004 |
| 174 | <i>Vicugna pacos</i> | Unknown* | 0.996 | 0.004 |
| 175 | <i>Vicugna pacos</i> | Unknown* | 0.997 | 0.003 |
| 176 | <i>Vicugna pacos</i> | Unknown* | 0.992 | 0.008 |
| 177 | <i>Vicugna pacos</i> | Unknown* | 0.984 | 0.016 |
| 178 | <i>Vicugna pacos</i> | Unknown* | 0.994 | 0.006 |
| 179 | <i>Vicugna pacos</i> | Unknown* | 0.997 | 0.003 |

|     |                      |          |       |       |
|-----|----------------------|----------|-------|-------|
| 180 | <i>Vicugna pacos</i> | Unknown* | 0.995 | 0.005 |
| 181 | <i>Vicugna pacos</i> | Unknown* | 0.993 | 0.007 |
| 182 | <i>Vicugna pacos</i> | Unknown* | 0.997 | 0.003 |
| 183 | <i>Vicugna pacos</i> | Unknown* | 0.995 | 0.005 |
| 184 | <i>Vicugna pacos</i> | Unknown* | 0.998 | 0.002 |
| 185 | <i>Vicugna pacos</i> | Unknown* | 0.998 | 0.002 |
| 186 | <i>Vicugna pacos</i> | Unknown* | 0.997 | 0.003 |
| 187 | <i>Vicugna pacos</i> | Unknown* | 0.946 | 0.054 |
| 188 | <i>Vicugna pacos</i> | Unknown* | 0.917 | 0.083 |
| 189 | <i>Vicugna pacos</i> | Unknown* | 0.994 | 0.006 |
| 190 | <i>Vicugna pacos</i> | Unknown* | 0.996 | 0.005 |
| 191 | <i>Vicugna pacos</i> | Unknown* | 0.997 | 0.003 |
| 192 | <i>Vicugna pacos</i> | Unknown* | 0.966 | 0.034 |
| 193 | <i>Vicugna pacos</i> | Unknown* | 0.998 | 0.002 |
| 194 | <i>Vicugna pacos</i> | Unknown* | 0.995 | 0.005 |
| 195 | <i>Vicugna pacos</i> | Unknown* | 0.991 | 0.009 |
| 196 | <i>Vicugna pacos</i> | Unknown* | 0.995 | 0.005 |
| 197 | <i>Vicugna pacos</i> | Unknown* | 0.994 | 0.006 |
| 198 | <i>Vicugna pacos</i> | Unknown* | 0.993 | 0.007 |
| 199 | <i>Vicugna pacos</i> | Unknown* | 0.983 | 0.017 |
| 200 | <i>Vicugna pacos</i> | Unknown* | 0.998 | 0.002 |
| 201 | <i>Vicugna pacos</i> | Chile    | 0.996 | 0.004 |
| 202 | <i>Vicugna pacos</i> | Unknown* | 0.994 | 0.006 |
| 203 | <i>Vicugna pacos</i> | Chile    | 0.992 | 0.008 |
| 204 | <i>Vicugna pacos</i> | Unknown* | 0.996 | 0.004 |
| 205 | <i>Vicugna pacos</i> | Unknown* | 0.985 | 0.015 |
| 206 | <i>Vicugna pacos</i> | Unknown* | 0.993 | 0.007 |
| 207 | <i>Vicugna pacos</i> | Unknown* | 0.986 | 0.014 |
| 208 | <i>Vicugna pacos</i> | Unknown* | 0.955 | 0.045 |
| 209 | <i>Vicugna pacos</i> | Unknown* | 0.992 | 0.008 |
| 210 | <i>Vicugna pacos</i> | Unknown* | 0.997 | 0.003 |
| 211 | <i>Vicugna pacos</i> | Unknown* | 0.998 | 0.002 |
| 212 | <i>Vicugna pacos</i> | Unknown* | 0.985 | 0.015 |
| 213 | <i>Vicugna pacos</i> | Unknown* | 0.986 | 0.014 |
| 214 | <i>Vicugna pacos</i> | Unknown* | 0.988 | 0.012 |
| 215 | <i>Vicugna pacos</i> | Unknown* | 0.993 | 0.007 |
| 216 | <i>Vicugna pacos</i> | Unknown* | 0.995 | 0.005 |
| 217 | <i>Lama glama</i>    | Unknown* | 0.002 | 0.998 |
| 218 | <i>Lama glama</i>    | Unknown* | 0.002 | 0.998 |
| 219 | <i>Lama glama</i>    | Unknown* | 0.003 | 0.997 |
| 220 | <i>Lama glama</i>    | England  | 0.018 | 0.982 |
| 221 | <i>Lama glama</i>    | Hungary  | 0.004 | 0.996 |
| 222 | <i>Lama glama</i>    | Unknown* | 0.002 | 0.998 |
| 223 | <i>Lama glama</i>    | Unknown* | 0.002 | 0.998 |
| 224 | <i>Lama glama</i>    | Unknown* | 0.002 | 0.998 |
| 225 | <i>Lama glama</i>    | Unknown* | 0.003 | 0.997 |

|     |                      |          |       |       |
|-----|----------------------|----------|-------|-------|
| 226 | <i>Lama glama</i>    | Unknown* | 0.005 | 0.995 |
| 227 | <i>Lama glama</i>    | Unknown* | 0.002 | 0.998 |
| 228 | <i>Lama glama</i>    | Unknown* | 0.002 | 0.998 |
| 229 | <i>Lama glama</i>    | Unknown* | 0.006 | 0.994 |
| 230 | <i>Lama glama</i>    | Unknown* | 0.018 | 0.982 |
| 231 | <i>Lama glama</i>    | Unknown* | 0.207 | 0.794 |
| 232 | <i>Lama glama</i>    | Poland   | 0.002 | 0.998 |
| 233 | <i>Vicugna pacos</i> | England  | 0.926 | 0.074 |
| 234 | <i>Lama glama</i>    | Unknown* | 0.003 | 0.997 |

---

\*It is believed that most individuals of unknown origin were imported from Chile.
